## Artificial selection methods from evolutionary computing show promise for directed evolution of microbes

Alexander Lalejini<sup>1,2</sup>, Emily Dolson<sup>3,4</sup>, Anya E. Vostinar<sup>5</sup>, Luis Zaman<sup>1,2</sup>

**Corresponding:** Alexander Lalejini (lalejini@umich.edu)

1. Department of Ecology and Evolutionary Biology, University of Michigan, Ann Arbor, MI, USA
2. Center for the Study of Complex Systems, University of Michigan, Ann Arbor, MI, USA
3. Department of Computer Science and Engineering, Michigan State University, East Lansing, MI, USA
4. Program in Ecology, Evolution, and Behavior, Michigan State University, East Lansing, MI, USA
5. Computer Science Department, Carleton College, Northfield, MN, USA

## **Abstract.**

Directed microbial evolution harnesses evolutionary processes in the laboratory to construct microorganisms with enhanced or novel functional traits. Attempting to direct evolutionary processes for applied goals is fundamental to evolutionary computation, which harnesses the principles of Darwinian evolution as a general purpose search engine for solutions to challenging computational problems. Despite their overlapping approaches, artificial selection methods from evolutionary computing are not commonly applied to living systems in the laboratory. In this work, we ask if parent selection algorithms—procedures for choosing promising progenitors—from evolutionary computation might be useful for directing the evolution of microbial populations when selecting for multiple functional traits. To do so, we introduce an agent-based model of directed microbial evolution, which we used to evaluate how well three selection algorithms from evolutionary computing (tournament selection, lexicase selection, and non-dominated elite selection) performed relative to methods commonly used in the laboratory (elite and top-10% selection). We found that multi-objective selection techniques from evolutionary computing (lexicase and non-dominated elite) generally outperformed the commonly used directed evolution approaches when selecting for multiple traits of interest. Our results motivate ongoing work transferring these multi-objective selection procedures into the laboratory. Additionally, our findings suggest that more sophisticated artificial selection methods from evolutionary computation should also be evaluated for use in directed microbial evolution.

**Keywords:** directed evolution, artificial selection, evolutionary computing, selection schemes, digital organisms, agent-based modeling

# 1 Introduction

2 Directed evolution harnesses laboratory artificial selection to generate biomolecules or or-  
3 ganisms with desirable functional traits (Arnold, 1998; Sánchez et al., 2021). The scale and  
4 specificity of artificial selection has been revolutionized by a deeper understanding of evo-  
5 lutionary and molecular biology in combination with technological innovations in sequenc-  
6 ing, data processing, laboratory techniques, and culturing devices. These advances have  
7 cultivated growing interest in directing the evolution of whole microbial communities with  
8 functions that can be harnessed in medical, biotech, and agricultural domains (Sánchez  
9 et al., 2021).

10 Of course, attempting to direct evolutionary processes for applied goals has not been lim-  
11 ited to biological systems. Evolutionary computing harnesses the principles of Darwinian  
12 evolution as a general-purpose search engine to find solutions to challenging computa-  
13 tional and engineering problems (Fogel, 2000). As in evolutionary computing, directed  
14 evolution in the laboratory begins with a library—or population—of variants (e.g., commu-  
15 nities, genomes, or molecules). Variants are scored based on a phenotypic trait (or set of  
16 traits) of interest, and the variants with the “best” traits are chosen to produce the next  
17 generation. Such approaches to picking progenitors are known as elitist selection algo-  
18 rithms in evolutionary computing (Bäck et al., 1997). Evolutionary computing research has  
19 shown that these elitist approaches to artificial selection can be sub-optimal in complex  
20 search spaces. On their own, elitist selection schemes fail to maintain diversity, which  
21 can lead to premature convergence (Hernandez, Lalejini, & Ofria, 2021; Lehman & Stan-  
22 ley, 2011a), and they lack mechanisms to balance multiple objectives. Artificial selection  
23 routines (*i.e.*, parent selection algorithms or selection schemes) are intensely studied in  
24 evolutionary computing, and many *in silico* selection techniques have been developed that  
25 improve the quality and diversity of evolved solutions (e.g., Goings et al., 2012; Goldberg,  
26 Richardson, et al., 1987; Hornby, 2006; Lehman & Stanley, 2011b; Mouret & Clune, 2015;

27 Spector, 2012).

28 Given their success, we expect that artificial selection methods developed for evolutionary  
29 computing will improve the efficacy of directed microbial evolution in the laboratory, espe-  
30 cially when simultaneously selecting for more than one trait (a common goal in evolutionary  
31 computation). However, directed microbial evolution differs from evolutionary computing  
32 in ways that may inhibit our ability to predict which techniques are most appropriate to  
33 apply in the laboratory. For example, candidate solutions in evolutionary computing are  
34 evaluated individually, resulting in high-resolution genotypic and phenotypic information  
35 that can be used for selecting parents, which are then copied, recombined, and mutated  
36 to produce offspring. In directed microbial evolution, individual-level evaluation is often  
37 intractable at the scale required for directed evolution; as such, evaluation often occurs at  
38 the population-level, and the highest performing populations are partitioned (instead of  
39 copied) to create “offspring” populations. Moreover, when traits of interest do not bene-  
40 fit individuals’ reproductive success, population-level artificial selection may work against  
41 individual-level selection, which increases the difficulty of steering evolution.

42 Here, we ask if artificial selection techniques developed for evolutionary computing might  
43 be useful for directing the evolution of microbial populations when selecting for multiple  
44 traits of interest: both for enhancing multiple traits in a single microbial strain and for pro-  
45 ducing a set diverse strains that specialize on different traits. To do so, we developed an  
46 agent-based model of directed evolution wherein we evolve populations of self-replicating  
47 computer programs that perform computation that contributes either to the phenotype of  
48 the individual or the phenotype of the population. Using our model, we evaluated how  
49 well three selection techniques from evolutionary computing (tournament, lexicase, and  
50 non-dominated elite selection) performed in a setting that mimics directed evolution on  
51 functions measurable at the population-level. Overall, we found that multi-objective selec-  
52 tion techniques (lexicase and non-dominated elite selection) generally outperformed the

53 selection schemes commonly applied to directed microbial evolution (elite and top-10%).  
54 In particular, our findings suggest that lexibase selection is a good candidate technique  
55 to transfer into the laboratory, especially when aiming to evolve a diverse set of specialist  
56 microbial populations. Additionally, we found population-level artificial selection can im-  
57 prove directed evolution outcomes even when functional traits of interest can be tied to  
58 individual-level reproductive success.

59 These findings lay the foundation for strengthened communication between the evolu-  
60 tionary computing and directed evolution communities. The evolution of biological or-  
61 ganisms (both natural and artificial) inspired the origination of evolutionary computation,  
62 and insights from evolutionary biology are regularly applied to evolutionary computing. As  
63 evolutionary computation has immense potential as a system for studying how to control  
64 laboratory evolution, these communities are positioned to form a virtuous cycle where in-  
65 sights from evolutionary computing are then applied back to directing the evolution of  
66 biological organisms. With this work, we seek to strengthen this feedback loop.

## 67 **2 Directed evolution**

68 Humans have harnessed evolution for millennia, applying artificial selection (knowingly  
69 and unknowingly) to domesticate a variety of animals, plants, and microorganisms (Cobb  
70 et al., 2013; Driscoll et al., 2009; Hill & Caballero, 1992; Libkind et al., 2011). More recently,  
71 a deeper understanding of evolution, genetics, and molecular biology in combination with  
72 technological advances have extended the use of artificial selection beyond domestication  
73 and conventional selective breeding. For example, artificial selection has been applied to  
74 biomolecules (Beaudry & Joyce, 1992; Chen & Arnold, 1993; Esvelt et al., 2011), genetic  
75 circuits (Yokobayashi et al., 2002), microorganisms (Ratcliff et al., 2012), viruses (Burrowes  
76 et al., 2019; Maheshri et al., 2006), and whole microbial communities (Goodnight, 1990;  
77 Sánchez et al., 2021; Swenson et al., 2000). In this work, we focus on directed microbial

78 evolution.

79 One approach to artificial selection is to configure organisms' environment such that desir-  
80 able traits are linked to growth or survival (referred to as "selection-based methods" (Wang  
81 et al., 2021)). In some sense, these selection-based methods passively harness artificial  
82 selection, as individuals with novel or enhanced functions of interest will tend to outcom-  
83 pete other conspecifics without requiring intervention beyond initial environmental ma-  
84 nipulations. In combination with continuous culture devices, this approach to directing  
85 evolution can be used to achieve high throughput microbial directed evolution, "automat-  
86 ically" evaluating many variants without manual analysis (DeBenedictis et al., 2021; Toprak  
87 et al., 2012; Wang et al., 2021). For example, to study mechanisms of antibiotic resistance,  
88 researchers have employed morbidostats that continuously monitor the growth of evolv-  
89 ing microbial populations and dynamically adjust antibiotic concentrations to maintain  
90 constant selection on further resistance (Toprak et al., 2012). However, linking desirable  
91 traits to organism survival can be challenging, requiring substantial knowledge about the  
92 organisms and the functions of interest.

93 Similar to conventional evolutionary algorithms, "screening-based methods" of directed  
94 evolution assess each variant individually and choose the most promising to propagate (Wang  
95 et al., 2021). Overall, screening-based methods are more versatile than selection-based  
96 methods because traits that are desirable can be directly discerned. However, screening  
97 requires more manual intervention and thus limits throughput. In addition to their gener-  
98 ality, screening-based methods also allow practitioners to more easily balance the relative  
99 importance of multiple objectives, such as yield, seed size, drought tolerance, *et cetera* in  
100 plant breeding (Bruce et al., 2019; Cooper et al., 2014).

101 In this work, we investigate screening-based methods of directed microbial evolution,  
102 as many insights and techniques from evolutionary computation are directly applicable.  
103 When directing microbial evolution, screening is applied at the population (or community)

104 level (Sánchez et al., 2021; Xie & Shou, 2021). During each cycle of directed microbial  
105 evolution, newly founded populations grow over a maturation period in which members  
106 of each population reproduce, mutate, and evolve. Next, populations are assessed, and  
107 promising populations are chosen as “parental populations” that will be partitioned into  
108 the next generation of “offspring populations”.

109 Screening-based artificial selection methods are analogous to parent selection algorithms  
110 or *selection schemes* in evolutionary computing. We know from evolutionary computing  
111 research that the most effective selection scheme depends on a range of factors, including  
112 the number of objectives (e.g., single- versus multi-objective), the form and complexity of  
113 the search space (e.g., smooth versus rugged), and the practitioner’s goal (e.g., generating a  
114 single solution versus many different solutions). Conventionally, however, screening-based  
115 methods of directing microbial evolution choose the overall “best” performing populations  
116 to propagate (e.g., the single best population or the top 10% (Xie et al., 2019)).

117 To the best of our knowledge, the more sophisticated methods of choosing progenitors  
118 from evolutionary computing have not been applied to directed evolution of microbes.  
119 However, artificial selection techniques from evolutionary computing have been applied  
120 in a range of other biological applications. For example, multi-objective evolutionary al-  
121 gorithms have been applied to DNA sequence design (Chaves-González, 2015; Shin et al.,  
122 2005); however, these applications are treated as computational optimization problems.  
123 A range of selection schemes from evolutionary computing have also been proposed for  
124 both biomolecule engineering (Currin et al., 2015; Handl et al., 2007) and agricultural se-  
125 lective breeding (especially for scenarios where genetic data can be exploited) (Rama-  
126 subramanian & Beavis, 2021). For example, using an NK landscape model, O’Hagan et al.  
127 evaluated the potential of elite selection, tournament selection, fitness sharing, and two  
128 rule-based learning selection schemes for selective breeding applications (O’Hagan et al.,  
129 2012). Inspired by genetic algorithms, island model approaches (Tanese, 1989) have been

130 proposed for improving plant and animal breeding programs (Ramasubramanian & Beavis,  
131 2021; Yabe et al., 2016), and Akdemir et al. applied multi-objective selection algorithms  
132 like non-dominated selection to plant and animal breeding (Akdemir et al., 2019). In each  
133 of these applications, however, artificial selection acted as screens on individuals and not  
134 whole populations; therefore, our work focuses on screening at the population-level in order  
135 to test the applicability of evolutionary computing selection algorithms as general-purpose  
136 screening methods for directed microbial evolution.

### 137 **3 Digital Directed Evolution**

138 Conducting directed evolution experiments in the laboratory can be slow and labor inten-  
139 sive, making it difficult to evaluate and tune new approaches to artificial selection *in vitro*.  
140 We could draw directly from evolutionary computing results when transferring techniques  
141 into the laboratory, but the extent to which these results would predict the efficacy (or  
142 appropriate parameterization) of a given algorithm in a laboratory setting is unclear. To  
143 address this, we developed an agent-based model of directed evolution of microbes for  
144 evaluating which techniques from evolutionary computing might be most applicable in the  
145 laboratory.

146 Figure 1 overviews our model of laboratory directed microbial evolution. Our model con-  
147 tains a population of populations (*i.e.*, a “metapopulation”). Each population comprises  
148 digital organisms (self-replicating computer programs) that compete for space in a well-  
149 mixed virtual environment. Both the digital organisms and their virtual environment are  
150 inspired by those of the Avida Digital Evolution Platform (Ofria et al., 2009), which is a  
151 well-established study system for *in silico* evolution experiments (*e.g.*, A. Lalejini et al.,  
152 2021; Lenski et al., 1999; Lenski et al., 2003; Zaman et al., 2014) and is a closer analog  
153 to microbial evolution than conventional evolutionary computing systems. However, we  
154 note that our model’s implementation is fully independent of Avida, as the Avida software



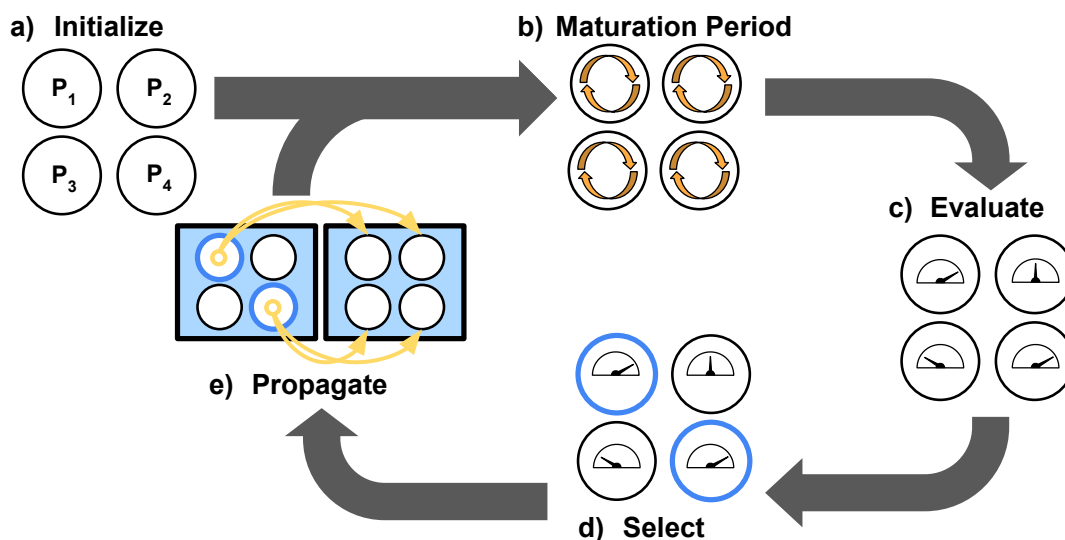

Figure 1: Overview of our model of directed microbial evolution. In (a), we found each of  $N$  populations with a single digital organism. Next (b), we give each population a maturation period during which organisms reproduce, mutate, and evolve. After maturation, (c) we evaluate each population based on population-level characteristics, and (d) we select populations (repeats allowed) to partition into  $N$  “offspring” populations (e).

155 platform does not allow for us to model laboratory setups of directed microbial evolution  
156 (as described in the previous section).

157 In our model, we initialize each population with a digital organism capable only of self-  
158 replication (Figure 1a). After initialization, directed evolution proceeds in cycles. During a  
159 cycle, we allow each population to evolve for a “maturation period” that comprises a fixed  
160 number of time steps (Figure 1b). We then evaluate each population’s performance on a set  
161 of objectives (Figure 1c), and we select performant populations as “parental” populations  
162 (Figure 1d). To create an “offspring” population (Figure 1e), we use a random sample of  
163 digital organisms from the chosen parental population; in this work, we used 1% of the  
164 maximum population size.

### 165 3.1 Digital Organisms

166 Each digital organism is defined by a sequence of program instructions (its genome) and  
167 a set of virtual hardware components used to interpret and express those instructions. The

168 virtual hardware and genetic representation used in this work extends that of (E. Dolson et  
169 al., 2019; Hernandez, Lalejini, & Dolson, 2021). The virtual hardware includes the following  
170 components: an instruction pointer indicating the position in the genome currently being  
171 executed, sixteen registers for performing computations, sixteen memory stacks, input and  
172 output buffers, “scopes” that facilitate modular code execution, and machinery to facilitate  
173 self-copying. For brevity, we refer readers to supplemental material for a more detailed  
174 description of these virtual hardware components (A. Lalejini et al., 2022).

175 Digital organisms express their genomes sequentially unless the execution of one instruc-  
176 tion changes which instruction should be executed next (e.g., “if” instructions). The instruc-  
177 tion set is Turing Complete and syntactically robust such that any ordering of instructions  
178 is valid (though not necessarily useful). The instruction set includes operators for basic  
179 math, flow control (e.g., conditional logic and looping), designating and triggering code  
180 modules, input, output, and self-replication. Each instruction contains three arguments,  
181 which may modify the effect of the instruction, often specifying memory locations or fixed  
182 values. We further document the instruction set in our supplemental material.

183 Digital organisms reproduce asexually by copying their genome instruction-by-instruction  
184 and then executing a `divide` instruction. However, copying is imperfect and can result in  
185 single-instruction and single-argument substitution mutations. We configured copy op-  
186 erations to err at an expected rate of one instruction per 100 copied and one argument  
187 per 200 copied. Genomes were fixed at a length of 100 instructions. When an organism  
188 replicates, its offspring is placed in a random position in the population, replacing any  
189 previous occupant. We limited the maximum population size to 1,000 organisms. As such,  
190 improvements to the rate of self-replication are advantageous in the competition for space  
191 within a population.

192 During evolution, organism replication can be improved two ways: by improving genome  
193 efficiency or by increasing the rate of genome expression (“metabolic rate”). An organ-

| Function        | # Inputs | Benefit    |
|-----------------|----------|------------|
| ECHO            | 1        | Individual |
| NAND            | 2        | Individual |
| NOT             | 1        | Population |
| ORNOT           | 2        | Population |
| AND             | 2        | Population |
| OR              | 2        | Population |
| ANDNOT          | 2        | Population |
| NOR             | 2        | Population |
| XOR             | 2        | Population |
| EQU             | 2        | Population |
| $2A$            | 1        | Individual |
| $A^2$           | 1        | Population |
| $A^3$           | 1        | Population |
| $A + B$         | 2        | Population |
| $A \times B$    | 2        | Population |
| $A - B$         | 2        | Population |
| $A^2 + B^2$     | 2        | Population |
| $A^3 + B^3$     | 2        | Population |
| $A^2 - B^2$     | 2        | Population |
| $A^3 - B^3$     | 2        | Population |
| $\frac{A+B}{2}$ | 2        | Population |

Table 1: Computational functions that conferred individual-level or population-level benefits. The particular functions were chosen to be used in our model based on those used in the Avida system (Bryson et al., 2021). In all experiments, we included two versions of ECHO (each for different input values), resulting in 22 possible functions that organisms could perform.

194 ism’s metabolic rate determines the speed at which it executes its genome. Digital or-  
195 ganisms can improve their metabolic rate by performing designated functions (referred to  
196 as individual-level functions), including some Boolean logic functions and simple mathe-  
197 matical expressions (Table 1). Organisms can perform functions by executing the `input`  
198 instruction to get numeric values from the environment, performing computations on those  
199 values, and executing an `output` instruction with the results. When an organism produces  
200 output, we check to see if the output completes any of the designated functions (Table 1);  
201 if so, the organism’s metabolic rate is adjusted accordingly. We guarantee that the set of  
202 inputs received by an organism result in a unique output for each designated function. Or-  
203 ganisms benefit from performing each function only once, preventing multiple rewards for  
204 repeating a single function result. In this work, we configured each function that confers  
205 an individual-level benefit to double an organism’s metabolic rate, which doubles the rate  
206 the organism can copy itself.

## 207 **3.2 Population-level Evaluation**

208 In addition to individual-level functions, organisms can perform 18 different population-  
209 level functions (Table 1). Unless stated otherwise, performing a population-level function  
210 does not improve an organism’s metabolic rate. Instead, population-level functions are  
211 used for population-level evaluation and selection, just as we might screen for the pro-  
212 duction of different biomolecules in laboratory populations. We assigned each population  
213 a score for each population-level function based on the number of organisms that per-  
214 formed that function during the population’s maturation period. The use of these scores  
215 for selecting progenitors varied by selection scheme (as described in Section 4.1).

216 While population-level functions benefit a population’s chance to propagate, they do not  
217 benefit an individual organism’s immediate reproductive success: time spent computing  
218 population-level functions is time not spent on performing individual-level functions or

219 self-replicating. Such conflicts between group-level and individual-level fitness are well-  
220 established in evolving systems (Simon et al., 2013; Waibel et al., 2009), and are indeed  
221 a problem recognized for screening-based methods of artificial selection that must be  
222 applied at the population-level (Brenner et al., 2008; Escalante et al., 2015).

## 223 **4 Methods**

224 Using our model of laboratory directed evolution, we investigated if selection schemes  
225 from evolutionary computing might be useful for directed evolution of microbes. Specifi-  
226 cally, we compared two selection schemes used in directed evolution (elite and top-10%  
227 selection) with three other methods used in evolutionary computing (tournament, lexi-  
228 case, and non-dominated elite selection). Additionally, we ran two controls that ignored  
229 population-level performance.

230 We conducted three independent experiments. First, we evaluated the relative perfor-  
231 mance of parent selection algorithms in a conventional evolutionary computing context,  
232 which established baseline expectations for subsequent experiments using our model of  
233 laboratory directed evolution. Next, we compared parent selection algorithms using our  
234 model of laboratory directed evolution in two contexts. In the first context, we did not link  
235 population-level functions (Table 1) to organism survival to evaluate how well each parent  
236 selection algorithm performs as a screening-based method of artificial selection. In the  
237 second context, we tested whether any of the selection schemes still improve overall di-  
238 rected evolution outcomes even when organism survival *is* aligned with population-level  
239 functions.

## 240 **4.1 Selection Schemes**

### 241 **4.1.1 Elite and top-10% selection**

242 Elite and top-10% selection are special cases of truncation selection (Mühlenbein & Schlierkamp-  
243 Voosen, 1993) or  $(\mu, \lambda)$  evolutionary strategies (Bäck et al., 1991) wherein candidates are  
244 ranked and the most performant are chosen as progenitors. We implement these selec-  
245 tion methods as they are used in laboratory directed evolution (Xie & Shou, 2021; Xie et  
246 al., 2019). Here, both elite and top-10% selection rank populations according to their ag-  
247 gregate performance on all population-level functions. Elite selection chooses the single  
248 best performing population to generate the next metapopulation, and top-10% chooses  
249 the best 10% (rounded up to the nearest whole number) as parental populations.

### 250 **4.1.2 Tournament selection**

251 Tournament selection is one of the most common parent selection methods in evolution-  
252 ary computing. To select a parental population,  $T$  populations are randomly chosen from  
253 the metapopulation to form a tournament ( $T = 4$  in this work). The population with the  
254 highest aggregate performance on all population-level functions wins the tournament and  
255 is chosen as a parent. We run  $N$  tournaments to choose the parental populations for each  
256 of  $N$  offspring populations.

### 257 **4.1.3 Lexicase selection**

258 Unlike the previously described selection schemes, lexicase selection does not aggre-  
259 gate measures of performance across population-level functions (*i.e.*, objectives) to choose  
260 parental populations. Instead, lexicase selection considers performance on each population-  
261 level function independently. For each parent selection event, all members of the metapop-  
262 ulation are initially considered candidates for selection. To select a parental population,  
263 the set of population-level functions are shuffled and considered in sequence. Each func-

264 tion (in shuffled order) is then used to sequentially filter candidates, removing all but the  
265 best candidates from further consideration. This process continues until only one candi-  
266 date remains to be selected or until all functions have been considered; if more than one  
267 candidate remains, one is selected at random.

268 Lexicase selection was originally proposed for test-based genetic programming prob-  
269 lems (Helmuth et al., 2015; Spector, 2012), but has since produced promising results in  
270 a variety of domains (Aenugu & Spector, 2019; La Cava et al., 2016; Metevier et al., 2019;  
271 Moore & Stanton, 2017). By randomly permuting the objectives for each parent selec-  
272 tion, lexicase selection maintains diversity (E. L. Dolson et al., 2018; Helmuth et al., 2016),  
273 which improves search space exploration (Hernandez, Lalejini, & Ofria, 2021) and overall  
274 problem-solving success (Helmuth & Spector, 2015; Hernandez, Lalejini, & Dolson, 2021).  
275 In particular, lexicase selection focuses on maintaining specialists (Helmuth et al., 2019).

#### 276 **4.1.4 Non-dominated elite selection**

277 Non-dominated elite selection is a simple multi-objective selection algorithm that chooses  
278 all populations that are not Pareto dominated by another population (Zitzler, 1999). A  
279 candidate,  $c_a$ , Pareto dominates another candidate,  $c_b$ , if the following two conditions are  
280 met: (1)  $c_a$  performs no worse than  $c_b$  on all population-level functions, and (2)  $c_a$  has strictly  
281 better performance than  $c_b$  on at least one population-level function. After identifying all  
282 non-dominated populations, these populations are selected with replacement to found  
283 each offspring population.

284 Pareto domination is a fundamental component in many successful evolutionary multi-  
285 objective optimization (EMOO) algorithms (Deb et al., 2002; Fonseca & Fleming, 1995;  
286 Horn et al., 1994; Zitzler, 1999). In general, EMOO algorithms aim to produce the set of  
287 solutions with optimal trade-offs of the objective set. Most EMOO algorithms have more  
288 sophisticated routines for parent selection than non-dominated elite selection (e.g., use of

289 external archives or crowding metrics). We opted to use non-dominated elite selection for  
290 its simplicity, but future work will explore more EMOO selection schemes.

#### 291 **4.1.5 Selection controls**

292 We used random and no selection as controls. Random selection chooses a random set of  
293 populations (with replacement) to serve as parental populations. “No selection” chooses  
294 all populations in the metapopulation as sources for founding the next generation of pop-  
295 ulations; that is, each population is chosen to produce one offspring population. Both  
296 controls apply no selection pressure for performing population-level functions.

## 297 **4.2 Experimental design**

### 298 **4.2.1 Establishing baseline problem-solving expectations in an evolutionary com- 299 puting context**

300 First, we evaluated the relative performance of parent selection algorithms in a conven-  
301 tional evolutionary computing context (linear genetic programming (Brameier & Banzhaf,  
302 2007)), in which we evolved programs to compute the functions in Table 1. This control  
303 experiment allowed us to verify that the genetic representation used by digital organisms  
304 (Section 3.1) is sufficient for evolving each of the computational functions used in subse-  
305 quent experiments. Additionally, the relative performances of each algorithm establishes  
306 an expectation for how each parent selection algorithm might perform in our model of  
307 laboratory directed evolution.

308 For each of the seven selection schemes described in Section 4.1, we evolved 50 replicate  
309 populations of 1,000 programs. We chose to evolve populations for 55,000 generations to  
310 approximate the number of digital organism generations that elapsed in our directed evo-  
311 lution experiments (based on exploratory runs). We used the same genetic representation  
312 as described in Section 3.1; however, we excluded self-replication instructions from the



313 instruction set, as we did not require programs to copy themselves during this experiment.  
314 Each program was evaluated independently to determine its phenotype. To evaluate a pro-  
315 gram, we executed it for 200 time steps, and we tracked its inputs and outputs to deter-  
316 mine which of the functions in Table 1 it performed (if any). For the purpose of selection, we  
317 treated each of the 22 possible functions as a pass-fail task. Lexicase and non-dominated  
318 elite selection considered each task separately to choose parents, while elite, top-10%, and  
319 tournament selection used the number of task passes as fitness values for choosing par-  
320 ents. Chosen parents reproduced asexually, and we applied mutations to offspring of the  
321 same types and frequencies as in our model of laboratory directed evolution (Section 3.1).  
322 At the end of each run, we identified the program that performed the most tasks, and  
323 we compared these values across treatments. We considered a run to be successful if it  
324 produced a program capable of performing all 22 tasks during evaluation.

#### 325 **4.2.2 Applying parent selection algorithms in a digital directed evolution context**

326 Next, we evaluated each selection scheme’s performance in our model of laboratory di-  
327 rected evolution. For each selection scheme, we ran 50 independent replicates of di-  
328 rected evolution for 2,000 cycles of population maturation, screening, and propagation  
329 (as shown in Figure 1). During each cycle, we gave populations a maturation period of 200  
330 updates<sup>1</sup> (approximately 25 to 35 generations). Within each replicate, the metapopulation  
331 comprised 96 populations (following the number of samples held by a standard microtiter  
332 plate used in laboratory experiments), each with a maximum carrying capacity of 1,000  
333 digital organisms. During a population’s maturation period, we measured the number of  
334 organisms that performed each of the 18 population-level functions (Table 1) as the pop-  
335 ulation’s “phenotype” for evaluation. We selected populations to propagate according to  
336 the treatment-specific selection scheme, and propagated chosen parental populations as

---

<sup>1</sup>One update is the amount of time required for the average organism in a population to execute 30 instructions.

337 described in Section 3.

338 At the end of the experiment, we analyzed the population-level functions performed by  
339 populations in each replicate's metapopulation. First, we calculated each population's  
340 "task profile", which is a binary vector that describes which population-level functions are  
341 "covered" by the population (zeroes are assigned for functions that are not covered and  
342 ones for those that are covered). A function is considered covered if it is performed by at  
343 least 50 organisms (a threshold ensuring the performance was not one-off) during a given  
344 maturation period.

345 Next, we measured the "best population task coverage" and "metapopulation task cov-  
346 erage" for each replicate. Best population task coverage is measured as the number of  
347 functions covered by the population with the largest set of covered functions. Metapop-  
348 ulation task coverage is measured as the number of functions covered across the entire  
349 metapopulation (*i.e.*, the union of unique tasks covered by each population in the metapop-  
350 ulation).

351 We also measured the phenotypic diversity within each metapopulation. Specifically, we  
352 measured the number of different task profiles present in the metapopulation (*i.e.*, pheno-  
353 typic richness), and we measured the "spread" of task profiles in the metapopulation. To  
354 measure a metapopulation's task profile spread, we calculated a centroid task profile as  
355 the average of all task profiles in the metapopulation, and then we calculated the average  
356 normalized cosine distance between each population's task profile and the centroid. A  
357 metapopulation's task spread summarizes how different the constituent populations' task  
358 profiles are from one another.

### 359 **4.2.3 Evaluating whether selection schemes improve directed evolution outcomes** 360 **when population-level functions are aligned with organism survival**

361 Selection-based methods of artificial selection tie desired traits to organism survival, elim-  
362 inating the need to apply screening-based methods to populations. We tested whether the  
363 addition of population-level selection improves directed evolution outcomes even when  
364 traits of interest (population-level functions) are selected for at the individual level (*i.e.*,  
365 tied to organism survival). To do so, we repeated our previously described directed evo-  
366 lution experiment (Section 4.2.2), except we configured all population-level functions to  
367 improve an organism's metabolic rate in addition to the individual-level functions. As  
368 such, all population-level functions were beneficial in all treatments, including the random  
369 and no selection controls. However, only treatments with non-control selection schemes  
370 applied artificial selection at the population-level.

## 371 **4.3 Statistical Analyses**

372 In general, we differentiated between sample distributions using non-parametric statisti-  
373 cal tests. For each major analysis, we first performed a Kruskal-Wallis test (Kruskal & Wallis,  
374 1952) to determine if there were significant differences in results across treatments (sig-  
375 nificance level  $\alpha = 0.05$ ). If so, we applied a Wilcoxon rank-sum test (Wilcoxon, 1992) to  
376 distinguish between pairs of treatments, using a Bonferroni correction for multiple com-  
377 parisons (Rice, 1989). Due to space limitations, we do not report all pairwise comparisons  
378 in our main results; however, all of our statistical results are included in our supplemental  
379 material.

## 380 **4.4 Software and Data Availability**

381 Our model of laboratory directed evolution is available on GitHub (see A. Lalejini et al.,  
382 2022) and is implemented using the Empirical scientific software library (Ofria et al., 2020).

383 We conducted all statistical analyses with R version 4.04 (R Core Team, 2021), using  
384 the following R packages for data analysis and visualization: tidyverse (Wickham et al.,  
385 2019), ggplot2 (Wickham, 2016), cowplot (Wilke, 2020), viridis (Garnier, 2018), and Color  
386 Brewer (Harrower & Brewer, 2003; Neuwirth, 2014). Our source code for experiments, anal-  
387 yses, and visualizations is publicly available on GitHub (see A. Lalejini et al., 2022). Addi-  
388 tionally, our experiment data are publicly archived on the Open Science Framework (see  
389 A. M. Lalejini, 2022).

## 390 **5 Results and Discussion**

### 391 **5.1 Baseline problem-solving expectations in an evolutionary com-** 392 **puting context**

393 First, we established baseline performance expectations for the selection schemes in a  
394 conventional genetic programming context to validate the solvability of the individual- and  
395 population-level functions used in our digital directed evolution experiments. Two se-  
396 lection schemes produced successful replicates, where success is defined as evolving a  
397 program capable of performing all 22 functions: elite (1/50) and lexicase selection (47/50).  
398 No solutions evolved in any other treatment. Figure 2 depicts the number of functions per-  
399 formed by the best program from each replicate. All selection schemes outperformed the  
400 random and no selection controls. Differences between all pairs except random and no  
401 selection were statistically significant (Bonferroni-corrected Wilcoxon rank-sum,  $p < 0.01$ ).  
402 Lexicase selection was the most performant followed by top-10%, elite, tournament, and  
403 non-dominated elite selection.

404 These data confirm that our genetic representation allows for the evolution of each com-  
405 putational function used in our model of laboratory directed evolution. Moreover, these  
406 data establish some expectations for the relative performance of each selection scheme in

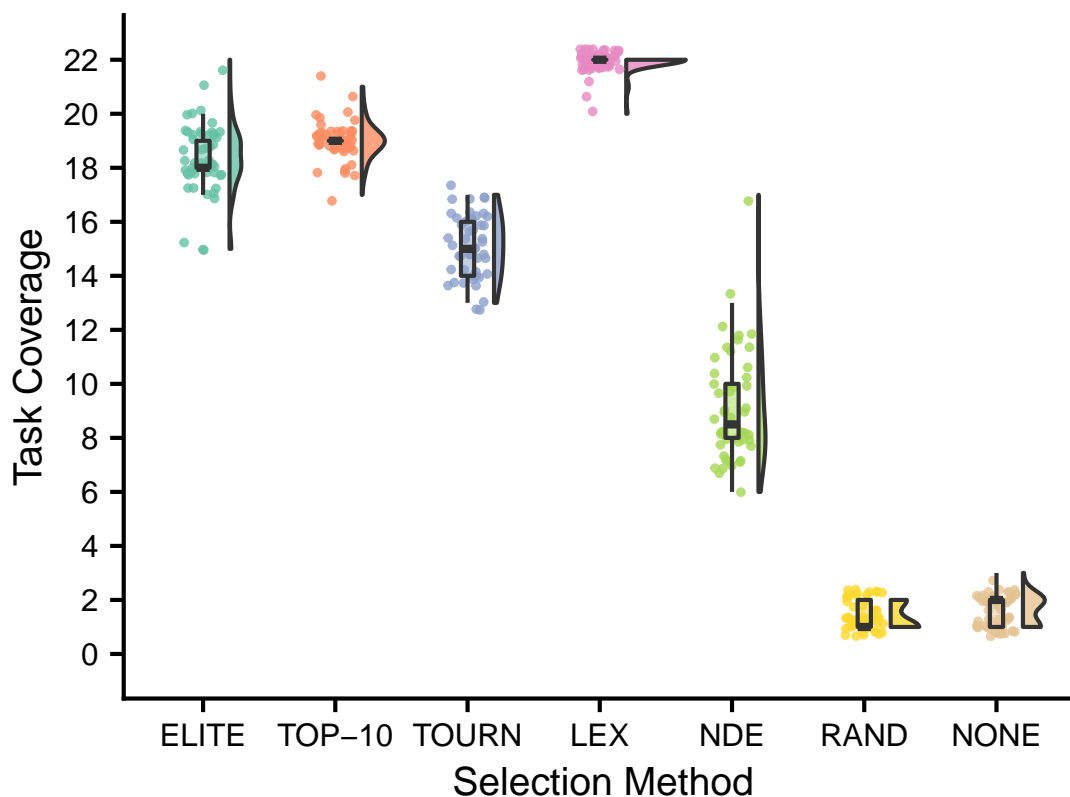

Figure 2: Task coverage of the best program (per replicate) evolved in an evolutionary computing context. Selection scheme abbreviations are as follows: TOURN is tournament, LEX is lexicase, NDE is non-dominated elite, RAND is random, and NONE is no selection. Differences among treatments were statistically significant (Kruskal-Wallis,  $p < 10^{-4}$ ).

407 our directed evolution experiments. Lexicase selection's strong performance is consistent  
408 with previous work demonstrating its efficacy on program synthesis problems (Helmuth &  
409 Abdelhady, 2020; Helmuth & Spector, 2015). While initially surprised by non-dominated  
410 elite's poor performance (relative to other non-control selection schemes), we note that  
411 selection methods based on Pareto domination are rarely applied to pass-fail test-based  
412 genetic programming problems, and perhaps the course-grained function scores (0 or 1)  
413 hindered its capacity for problem-solving success.

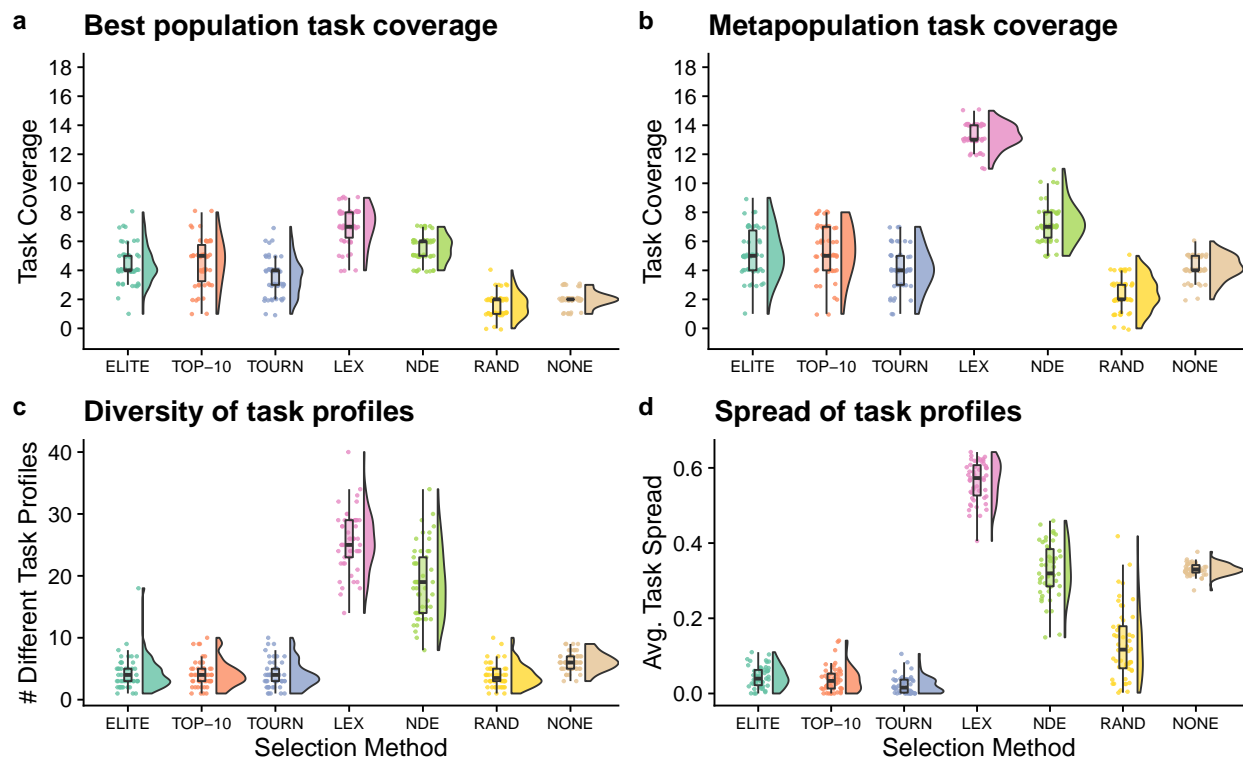

Figure 3: Digital directed evolution results. Differences among treatments were statistically significant for each panel (Kruskal-Wallis,  $p < 10^{-4}$ ).

## 5.2 Lexicase and non-dominated elite selection show promise for directed evolution

Next, we compared selection scheme performance when modeling the directed evolution of digital organisms. Figures 3a and 3b show the best population and metapopulation task coverages, respectively. All selection schemes resulted in greater single-population task coverage than both random and no selection controls (Bonferroni-corrected Wilcoxon rank-sum test,  $p < 10^{-4}$ ). Metapopulation coverage under tournament selection was not significantly different than coverage under the no selection control, but all other selection schemes resulted in significantly better metapopulation coverage than both controls (Bonferroni-corrected Wilcoxon rank-sum,  $p < 0.03$ ). Overall, lexicase and non-dominated elite selection scored the greatest population and metapopulation task coverage out of all selection schemes, and lexicase was the overall best selection scheme according to both metrics of performance.

427 While differences were significant on the best population-task coverage, they were not  
428 necessarily substantial. However, other measures had more substantial differences. Both  
429 multi-objective selection schemes—lexicase and non-dominated elite—had the greatest  
430 metapopulation task coverage (Figure 3b), and the greatest diversity of task profiles in  
431 the final metapopulations (Figure 3c; Bonferroni-corrected Wilcoxon rank-sum test,  $p <$   
432  $10^{-4}$ ). Lexicase selection in particular also had the greatest task profile *spread* (Figure 3d;  
433 Bonferroni-corrected Wilcoxon rank-sum test,  $p < 10^{-4}$ ), which is consistent with previous  
434 results demonstrating that lexicase excels at maintaining diverse specialists (E. L. Dolson  
435 et al., 2018; Helmuth et al., 2016; Helmuth et al., 2019; Hernandez, Lalejini, & Ofria, 2021).

436 We hypothesized that lexicase and non-dominated elite selection’s mechanisms for select-  
437 ing different *types* of parental populations underpinned their improved performance over  
438 elite, top-10%, and tournament selection. This, however, is confounded by each selection  
439 scheme’s varying capacity to select a greater number of different populations (regardless  
440 of differences in those selected). As such, we asked whether lexicase and non-dominated  
441 elite’s success could be explained by a capacity to select a greater number of different  
442 parental populations. Elite selection selected exactly one population per cycle, top-10%  
443 selected 10, lexicase selected an average of 12, tournament selected an average of 50, and  
444 non-dominated elite selected an average of 83 different populations. Thus, we can rule  
445 out the number of populations selected per cycle as the sole explanation for lexicase se-  
446 lection’s success; we argue that this, in combination with our diversity data, suggests that  
447 directed evolution practitioners should consider incorporating mechanisms for selecting  
448 phenotypically diverse parental populations into their artificial selection approaches.

449 These results are also informative when compared to our genetic programming control  
450 experiment (Figure 2). While results across these two contexts are not directly compara-  
451 ble, we argue that, taken together, our experiments suggest that steering evolution at the  
452 population-level is more challenging than steering at the individual-level. For example,

453 across all treatments, no single population in our model of directed evolution performed  
454 all 18 population-level functions. Yet, after a similar number of organism-level genera-  
455 tions (~55,000), both elite and lexicase selection produced programs capable of all 22  
456 functions in a genetic programming context; even after only 2,000 generations (the num-  
457 ber of cycles in our directed evolution experiments), we found that conventional genetic  
458 programming produced more performant programs than those evolved under our model  
459 of laboratory directed evolution (supplemental material A. Lalejini et al., 2022). We also  
460 observed differences in the rank order of selection schemes between experiments. For ex-  
461 ample, non-dominated elite selection performed poorly in a genetic programming context  
462 relative to the other non-control selection schemes; however, non-dominated elite outper-  
463 formed all selection schemes except lexicase selection in our model of laboratory directed  
464 evolution. On its own, non-dominated elite's difference in performance is not surprising, as  
465 non-dominated elite selection is not conventionally used for evolving computer programs  
466 where evaluation criteria are evaluated on a pass-fail basis. More broadly, however, we  
467 argue that this result highlights modeling as an important intermediate step when evaluat-  
468 ing which techniques from evolutionary computing are likely to be effective in a laboratory  
469 setting.

### 470 **5.3 Selection schemes improve outcomes even when organism sur-** 471 **vival can be tied to population-level functions**

472 Next, we tested whether the addition of population-level screening improves directed evo-  
473 lution outcomes even when population-level functions can be tied to organism survival.  
474 Overall, each non-control selection scheme resulted in better single-population task cov-  
475 erage than either control treatment (Figure 4a; Bonferroni-corrected Wilcoxon rank-sum  
476 test,  $p < 10^{-4}$ ). We did not find significant differences in best population coverage among  
477 elite, top-10%, tournament, and non-dominated elite selection. In contrast to our previous



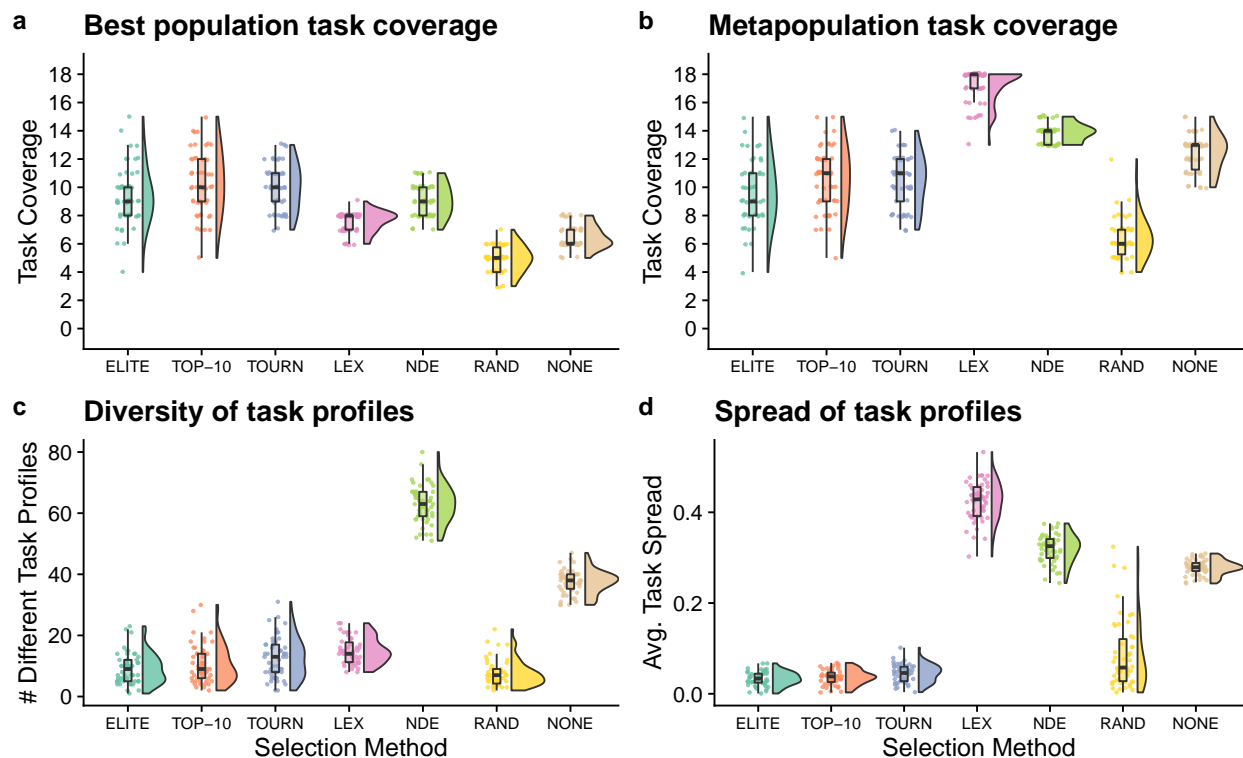

Figure 4: Digital directed evolution results when organism survival is tied to population-level functions. Differences among treatments were statistically significant for each panel (Kruskall-Wallis,  $p < 10^{-4}$ ).

478 experiment, lexicase selection resulted in lower best population coverage than each other  
479 non-control selection scheme (Bonferroni-corrected Wilcoxon rank-sum test,  $p < 10^{-4}$ ).

480 Lexicase selection, however, outperformed all other selection schemes on metapopulation  
481 task coverage (Figure 4b; Bonferroni-corrected Wilcoxon rank-sum test,  $p < 10^{-4}$ ), produc-  
482 ing 30 metapopulations that cover all 18 population-level functions. In general, lexicase  
483 selection produced metapopulations containing distinct specialist populations, resulting  
484 in high metapopulation task coverage while each specialist population had low task cov-  
485 erage on its own. Indeed, while lexicase metapopulations did not necessarily comprise  
486 many different population task profiles (Figure 4c), the task profiles were very different  
487 from one another (Figure 4d).

488 Of our two control selection methods, we found that performing no selection was bet-  
489 ter than random selection for both single-population and metapopulation task coverage

490 (Bonferroni-corrected Wilcoxon rank-sum test,  $p < 10^{-4}$ ). In fact, performing no selection  
491 at all resulted in better metapopulation task coverage than elite, top-10%, and tournament  
492 selection (Bonferroni-corrected Wilcoxon rank-sum test,  $p < 10^{-3}$ ). We hypothesize that this  
493 result is because elite, top-10%, and tournament selection converge to metapopulations  
494 with homogeneous task profiles, while performing no selection at all allows populations to  
495 diverge from one another.

## 496 **6 Conclusion**

497 In this work, we investigated whether the selection schemes from evolutionary computing  
498 might be useful for directing the evolution of microbial populations. To do so, we intro-  
499 duced an agent-based model of laboratory directed evolution. Overall, our results suggest  
500 that lexicase and non-dominated elite selection are promising techniques to transfer into  
501 the laboratory when selecting for multiple traits of interest, as both of these selection  
502 schemes resulted in improved outcomes relative to conventional directed evolution selec-  
503 tion methods. In particular, we expect lexicase selection to be especially useful for evolving  
504 a set of microbial populations, each specializing on different population-level functions.  
505 We also found that the addition of screening-based methods of artificial selection can im-  
506 prove directed evolution outcomes in cases where organisms' reproductive success can  
507 be tied to traits of interest.

508 Our study has several important limitations that warrant future model development and  
509 experimentation. For example, we focused on modeling microbial populations that grow  
510 (and evolve) in a simple environment without complex ecological interactions. We plan to  
511 add ecological dynamics by incorporating features such as limited resources, waste by-  
512 products, symbiotic interactions, and spatial structure. These extensions will allow us to  
513 model the directed evolution of complex microbial communities (e.g., Sánchez et al., 2021;  
514 Xie & Shou, 2021), which is an emerging frontier in laboratory directed evolution.

515 In this study, we compared simple versions of each selection scheme. We plan to test  
516 more sophisticated selection schemes as we continue to transfer techniques developed  
517 for evolutionary computation into the laboratory. For example, non-dominated elite se-  
518 lection is one of the simplest methods that uses Pareto domination to choose parents;  
519 given its strong performance, we see more sophisticated multi-objective selection algo-  
520 rithms (e.g., NSGA-II (Deb et al., 2002)) as particularly promising for laboratory directed  
521 evolution. Lexicase selection variants are also promising for laboratory directed evolu-  
522 tion: epsilon lexicase (La Cava et al., 2016; Spector et al., 2018) might be useful when  
523 population-level characteristics are measured as real-valued quantities, and cohort lexi-  
524 case selection (Hernandez et al., 2019) could reduce the amount of screening required to  
525 select parental populations. Beyond selection schemes, we also see quality diversity algo-  
526 rithms (Hagg, 2021) (e.g., MAP-Elites (Mouret & Clune, 2015)) as promising techniques to  
527 transfer into the laboratory.

528 We see digital experiments like the ones reported here as a critical step for transferring  
529 techniques developed for evolutionary computing into the laboratory. Indeed, our results  
530 are currently informing the design of laboratory experiments that apply evolutionary com-  
531 puting techniques to the directed evolution of *E. coli*. Our model of directed microbial  
532 evolution provides a testbed for rigorously evaluating different artificial selection methods  
533 with different laboratory setups (e.g., metapopulation size, maturation period, etc.) before  
534 embarking on costly or timing consuming laboratory experiments.

## 535 **Acknowledgements**

536 We thank the ZE<sup>3</sup> Laboratory for thoughtful discussions, feedback, and support. This  
537 research was supported through computational resources provided by the University of  
538 Michigan's Advanced Research Computing and by Michigan State University's Institute  
539 for Cyber-Enabled Research. Additionally, this research was supported by the National

540 Science Foundation (NSF) through support to LZ (DEB-1813069) and a sub-award to AEV  
541 (MCB-1750125).

## 542 **Supplementary information**

543 The supplemental material for this article, including all source code, is archived (see ref-  
544 erence) and hosted on GitHub and can be found online at [https://github.com/amlalejini/  
545 directed-digital-evolution](https://github.com/amlalejini/directed-digital-evolution) (A. Lalejini et al., 2022). The datasets generated and analyzed  
546 for this study are archived on the Open Science Framework at <https://osf.io/zn63x> (A. M.  
547 Lalejini, 2022).

## 548 **References**

- 549 Aenugu, S., & Spector, L. (2019). Lexicase selection in learning classifier systems. *Pro-*  
550 *ceedings of the Genetic and Evolutionary Computation Conference on - GECCO*  
551 *'19*, 356–364. <https://doi.org/10.1145/3321707.3321828>
- 552 Akdemir, D., Beavis, W., Fritsche-Neto, R., Singh, A. K., & Isidro-Sánchez, J. (2019). Multi-  
553 objective optimized genomic breeding strategies for sustainable food improvement.  
554 *Heredity*, 122(5), 672–683. <https://doi.org/10.1038/s41437-018-0147-1>
- 555 Arnold, F. H. (1998). Design by Directed Evolution. *Accounts of Chemical Research*, 31(3),  
556 125–131. <https://doi.org/10.1021/ar960017f>
- 557 Bäck, T., Fogel, D., & Michalewicz, Z. (Eds.). (1997). *Handbook of Evolutionary Computation*  
558 (1st ed.). <https://doi.org/10.1201/9780367802486>
- 559 Bäck, T., Hoffmeister, F., & Schwefel, H.-P. (1991). A Survey of Evolution Strategies. *Pro-*  
560 *ceedings of the Fourth International Conference on Genetic Algorithms*, 2–9.
- 561 Beaudry, A. A., & Joyce, G. F. (1992). Directed Evolution of an RNA Enzyme. *Science*, 257(5070),  
562 635–641. <https://doi.org/10.1126/science.1496376>

- 563 Brameier, M. F., & Banzhaf, W. (2007). *Linear Genetic Programming*. Springer US. <https://doi.org/10.1007/978-0-387-31030-5>
- 564
- 565 Brenner, K., You, L., & Arnold, F. H. (2008). Engineering microbial consortia: A new frontier
- 566 in synthetic biology. *Trends in Biotechnology*, 26(9), 483–489. <https://doi.org/10.1016/j.tibtech.2008.05.004>
- 567
- 568 Bruce, R. W., Grainger, C. M., Ficht, A., Eskandari, M., & Rajcan, I. (2019). Trends in Soybean
- 569 Trait Improvement over Generations of Selective Breeding. *Crop Science*, 59(5),
- 570 1870–1879. <https://doi.org/10.2135/cropsci2018.11.0664>
- 571 Bryson, D., Baer, B., Vostinar, A., Ofria, C., Barrick, J., Zaman, L., Goldsby, H., cholden23,
- 572 cse801a, Goings, S., Dolson, E., Rupp, M., Covert, A., vogelmi3-msu, Grace, dule123,
- 573 Nahum, J., Blackwood, D., Wagner, A. P., ... jcfisher. (2021). *Avida digital evolution*
- 574 *platform software* (Version 2.14.0). Zenodo. <https://doi.org/10.5281/zenodo.5068026>
- 575
- 576 Burrowes, B., Molineux, I., & Fralick, J. (2019). Directed in Vitro Evolution of Therapeutic
- 577 Bacteriophages: The Appelmans Protocol. *Viruses*, 11(3), 241. <https://doi.org/10.3390/v11030241>
- 578
- 579 Chaves-González, J. M. (2015). Hybrid multiobjective metaheuristics for the design of re-
- 580 liable DNA libraries. *Journal of Heuristics*, 21(6), 751–788. <https://doi.org/10.1007/s10732-015-9298-x>
- 581
- 582 Chen, K., & Arnold, F. H. (1993). Tuning the activity of an enzyme for unusual environments:
- 583 Sequential random mutagenesis of subtilisin E for catalysis in dimethylformamide.
- 584 *Proceedings of the National Academy of Sciences*, 90(12), 5618–5622. <https://doi.org/10.1073/pnas.90.12.5618>
- 585
- 586 Cobb, R. E., Chao, R., & Zhao, H. (2013). Directed evolution: Past, present, and future. *AIChE*
- 587 *Journal*, 59(5), 1432–1440. <https://doi.org/10.1002/aic.13995>

- 588 Cooper, M., Gho, C., Leafgren, R., Tang, T., & Messina, C. (2014). Breeding drought-tolerant  
589 maize hybrids for the US corn-belt: Discovery to product. *Journal of Experimental*  
590 *Botany*, 65(21), 6191–6204. <https://doi.org/10.1093/jxb/eru064>
- 591 Currin, A., Swainston, N., Day, P. J., & Kell, D. B. (2015). Synthetic biology for the directed  
592 evolution of protein biocatalysts: Navigating sequence space intelligently. *Chemical*  
593 *Society Reviews*, 44(5), 1172–1239. <https://doi.org/10.1039/C4CS00351A>
- 594 Deb, K., Pratap, A., Agarwal, S., & Meyarivan, T. (2002). A fast and elitist multiobjective  
595 genetic algorithm: NSGA-II. *IEEE Transactions on Evolutionary Computation*, 6(2),  
596 182–197. <https://doi.org/10.1109/4235.996017>
- 597 DeBenedictis, E. A., Chory, E. J., Gretton, D. W., Wang, B., Golas, S., & Esvelt, K. M. (2021). Sys-  
598 tematic molecular evolution enables robust biomolecule discovery. *Nature Methods*.  
599 <https://doi.org/10.1038/s41592-021-01348-4>
- 600 Dolson, E., Lalejini, A., & Ofria, C. (2019). Exploring Genetic Programming Systems with  
601 MAP-Elites. In W. Banzhaf, L. Spector, & L. Sheneman (Eds.), *Genetic Programming*  
602 *Theory and Practice XVI* (pp. 1–16). Springer International Publishing. [https://doi.org/10.1007/978-3-030-04735-1\\_1](https://doi.org/10.1007/978-3-030-04735-1_1)
- 603
- 604 Dolson, E. L., Banzhaf, W., & Ofria, C. (2018). *Ecological theory provides insights about*  
605 *evolutionary computation* (preprint). PeerJ Preprints. [https://doi.org/10.7287/peerj.](https://doi.org/10.7287/peerj.preprints.27315v1)  
606 [preprints.27315v1](https://doi.org/10.7287/peerj.preprints.27315v1)
- 607 Driscoll, C. A., Macdonald, D. W., & O'Brien, S. J. (2009). From wild animals to domestic  
608 pets, an evolutionary view of domestication. *Proceedings of the National Academy*  
609 *of Sciences*, 106, 9971–9978. <https://doi.org/10.1073/pnas.0901586106>
- 610 Escalante, A. E., Rebolledo-Gómez, M., Benítez, M., & Travisano, M. (2015). Ecological per-  
611 spectives on synthetic biology: Insights from microbial population biology. *Frontiers*  
612 *in Microbiology*, 6. <https://doi.org/10.3389/fmicb.2015.00143>

- 613 Esvelt, K. M., Carlson, J. C., & Liu, D. R. (2011). A system for the continuous directed evo-  
614 lution of biomolecules. *Nature*, 472(7344), 499–503. [https://doi.org/10.1038/  
615 nature09929](https://doi.org/10.1038/nature09929)
- 616 Fogel, D. (2000). What is evolutionary computation? *IEEE Spectrum*, 37(2), 26–32. <https://doi.org/10.1109/6.819926>  
617
- 618 Fonseca, C. M., & Fleming, P. J. (1995). An Overview of Evolutionary Algorithms in Multiob-  
619 jective Optimization. *Evolutionary Computation*, 3(1), 1–16. [https://doi.org/10.1162/  
620 evco.1995.3.1.1](https://doi.org/10.1162/evco.1995.3.1.1)
- 621 Garnier, S. (2018). *Viridis: Default color maps from 'matplotlib'* [R package version 0.5.1].  
622 <https://CRAN.R-project.org/package=viridis>
- 623 Goings, S., Goldsby, H., Cheng, B. H., & Ofria, C. (2012). An ecology-based evolutionary  
624 algorithm to evolve solutions to complex problems. *Artificial Life* 13, 171–177. <https://doi.org/10.7551/978-0-262-31050-5-ch024>  
625
- 626 Goldberg, D. E., Richardson, J. et al. (1987). Genetic algorithms with sharing for multimodal  
627 function optimization. *Genetic algorithms and their applications: Proceedings of  
628 the Second International Conference on Genetic Algorithms*, 41–49.
- 629 Goodnight, C. J. (1990). Experimental Studies of Community Evolution I: The Response to  
630 Selection at the Community Level. *Evolution*, 44(6), 1614. [https://doi.org/10.2307/  
631 2409341](https://doi.org/10.2307/2409341)
- 632 Hagg, A. (2021). Phenotypic Niching Using Quality Diversity Algorithms [Series Title: Natural  
633 Computing Series]. In M. Preuss, M. G. Epitropakis, X. Li, & J. E. Fieldsend (Eds.),  
634 *Metaheuristics for Finding Multiple Solutions* (pp. 287–315). Springer International  
635 Publishing. [https://doi.org/10.1007/978-3-030-79553-5\\_12](https://doi.org/10.1007/978-3-030-79553-5_12)
- 636 Handl, J., Kell, D. B., & Knowles, J. (2007). Multiobjective Optimization in Bioinformatics  
637 and Computational Biology. *IEEE/ACM Transactions on Computational Biology and  
638 Bioinformatics*, 4(2), 279–292. <https://doi.org/10.1109/TCBB.2007.070203>

- 639 Harrower, M., & Brewer, C. A. (2003). ColorBrewer.org: An Online Tool for Selecting Colour  
640 Schemes for Maps. *The Cartographic Journal*, 40(1), 27–37. [https://doi.org/10.1179/  
641 000870403235002042](https://doi.org/10.1179/000870403235002042)
- 642 Helmuth, T., & Abdelhady, A. (2020). Benchmarking parent selection for program synthe-  
643 sis by genetic programming. *Proceedings of the 2020 Genetic and Evolutionary  
644 Computation Conference Companion*, 237–238. [https://doi.org/10.1145/3377929.  
645 3389987](https://doi.org/10.1145/3377929.3389987)
- 646 Helmuth, T., McPhee, N. F., & Spector, L. (2016). Lexicase Selection for Program Synthesis:  
647 A Diversity Analysis [Series Title: Genetic and Evolutionary Computation]. In R. Ri-  
648 olo, W. Worzel, M. Kotanchek, & A. Kordon (Eds.), *Genetic Programming Theory and  
649 Practice XIII* (pp. 151–167). Springer International Publishing. [https://doi.org/10.  
650 1007/978-3-319-34223-8\\_9](https://doi.org/10.1007/978-3-319-34223-8_9)
- 651 Helmuth, T., Pantridge, E., & Spector, L. (2019). Lexicase selection of specialists. *Proceed-*  
652 *ings of the Genetic and Evolutionary Computation Conference on - GECCO '19*,  
653 1030–1038. <https://doi.org/10.1145/3321707.3321875>
- 654 Helmuth, T., & Spector, L. (2015). General Program Synthesis Benchmark Suite. *Proceed-*  
655 *ings of the 2015 on Genetic and Evolutionary Computation Conference - GECCO*  
656 *'15*, 1039–1046. <https://doi.org/10.1145/2739480.2754769>
- 657 Helmuth, T., Spector, L., & Matheson, J. (2015). Solving Uncompromising Problems With  
658 Lexicase Selection. *IEEE Transactions on Evolutionary Computation*, 19(5), 630–  
659 643. <https://doi.org/10.1109/TEVC.2014.2362729>
- 660 Hernandez, J. G., Lalejini, A., & Dolson, E. (2021). What can phylogenetic metrics tell us  
661 about useful diversity in evolutionary algorithms? [arXiv: 2108.12586]. *arXiv:2108.12586*  
662 *[cs, q-bio]*. Retrieved December 29, 2021, from <http://arxiv.org/abs/2108.12586>  
663 Comment: 21 page, 7 figures. Presented Genetic Programming in Theory and Prac-  
664 tice, 2021



- 665 Hernandez, J. G., Lalejini, A., Dolson, E., & Ofria, C. (2019). Random subsampling improves  
666 performance in lexicase selection. *Proceedings of the Genetic and Evolutionary*  
667 *Computation Conference Companion on - GECCO '19, 2028–2031*. [https://doi.org/](https://doi.org/10.1145/3319619.3326900)  
668 [10.1145/3319619.3326900](https://doi.org/10.1145/3319619.3326900)
- 669 Hernandez, J. G., Lalejini, A., & Ofria, C. (2021). An Exploration of Exploration: Measur-  
670 ing the ability of lexicase selection to find obscure pathways to optimality [arXiv:  
671 [2107.09760](https://arxiv.org/abs/2107.09760)]. *arXiv:2107.09760 [cs]*. Retrieved December 30, 2021, from [http://](http://arxiv.org/abs/2107.09760)  
672 [arxiv.org/abs/2107.09760](http://arxiv.org/abs/2107.09760)
- 673 Comment: Changes to the axis labels and added funding sources to acknowledg-  
674 ments
- 675 Hill, W. G., & Caballero, A. (1992). Artificial Selection Experiments. *Annual Review of Ecology*  
676 *and Systematics*, *23*(1), 287–310. [https://doi.org/10.1146/annurev.es.23.110192.](https://doi.org/10.1146/annurev.es.23.110192.001443)  
677 [001443](https://doi.org/10.1146/annurev.es.23.110192.001443)
- 678 Horn, J., Nafpliotis, N., & Goldberg, D. (1994). A niched Pareto genetic algorithm for mul-  
679 tiobjective optimization. *Proceedings of the First IEEE Conference on Evolutionary*  
680 *Computation. IEEE World Congress on Computational Intelligence*, 82–87. [https:](https://doi.org/10.1109/ICEC.1994.350037)  
681 [//doi.org/10.1109/ICEC.1994.350037](https://doi.org/10.1109/ICEC.1994.350037)
- 682 Hornby, G. S. (2006). ALPS: The age-layered population structure for reducing the problem  
683 of premature convergence. *Proceedings of the 8th annual conference on Genetic*  
684 *and evolutionary computation - GECCO '06*, 815. [https://doi.org/10.1145/1143997.](https://doi.org/10.1145/1143997.1144142)  
685 [1144142](https://doi.org/10.1145/1143997.1144142)
- 686 Kruskal, W. H., & Wallis, W. A. (1952). Use of Ranks in One-Criterion Variance Analysis.  
687 *Journal of the American Statistical Association*, *47*(260), 583–621. [https://doi.org/](https://doi.org/10.1080/01621459.1952.10483441)  
688 [10.1080/01621459.1952.10483441](https://doi.org/10.1080/01621459.1952.10483441)
- 689 La Cava, W., Spector, L., & Danai, K. (2016). Epsilon-Lexicase Selection for Regression.  
690 *Proceedings of the Genetic and Evolutionary Computation Conference 2016*, 741–  
691 748. <https://doi.org/10.1145/2908812.2908898>

- 692 Lalejini, A., Dolson, E., Vostinar, A. E., & Zaman, L. (2022). *Supplemental material for this*  
693 *manuscript hosted on GitHub*. <https://doi.org/10.5281/zenodo.6403135>
- 694 Lalejini, A., Ferguson, A. J., Grant, N. A., & Ofria, C. (2021). Adaptive Phenotypic Plasticity  
695 Stabilizes Evolution in Fluctuating Environments. *Frontiers in Ecology and Evolution*,  
696 9, 715381. <https://doi.org/10.3389/fevo.2021.715381>
- 697 Lalejini, A. M. (2022). [Data] Selection schemes from evolutionary computing show promise  
698 for directed evolution of microbes. <https://doi.org/10.17605/OSF.IO/ZN63X>
- 699 Lehman, J., & Stanley, K. O. (2011a). Abandoning Objectives: Evolution Through the Search  
700 for Novelty Alone. *Evolutionary Computation*, 19(2), 189–223. [https://doi.org/10.](https://doi.org/10.1162/EVCO_a_00025)  
701 1162/EVCO\_a\_00025
- 702 Lehman, J., & Stanley, K. O. (2011b). Evolving a diversity of virtual creatures through nov-  
703 elty search and local competition. *Proceedings of the 13th annual conference on*  
704 *Genetic and evolutionary computation - GECCO '11*, 211. [https://doi.org/10.1145/](https://doi.org/10.1145/2001576.2001606)  
705 2001576.2001606
- 706 Lenski, R. E., Ofria, C., Collier, T. C., & Adami, C. (1999). Genome complexity, robustness  
707 and genetic interactions in digital organisms. *Nature*, 400(6745), 661–664. <https://doi.org/10.1038/23245>
- 708 [//doi.org/10.1038/23245](https://doi.org/10.1038/23245)
- 709 Lenski, R. E., Ofria, C., Pennock, R. T., & Adami, C. (2003). The evolutionary origin of complex  
710 features. *Nature*, 423(6936), 139–144. <https://doi.org/10.1038/nature01568>
- 711 Libkind, D., Hittinger, C. T., Valerio, E., Goncalves, C., Dover, J., Johnston, M., Goncalves,  
712 P., & Sampaio, J. P. (2011). Microbe domestication and the identification of the  
713 wild genetic stock of lager-brewing yeast. *Proceedings of the National Academy of*  
714 *Sciences*, 108(35), 14539–14544. <https://doi.org/10.1073/pnas.1105430108>
- 715 Maheshri, N., Koerber, J. T., Kaspar, B. K., & Schaffer, D. V. (2006). Directed evolution of  
716 adeno-associated virus yields enhanced gene delivery vectors. *Nature Biotechnol-*  
717 *ogy*, 24(2), 198–204. <https://doi.org/10.1038/nbt1182>

- 718 Metevier, B., Saini, A. K., & Spector, L. (2019). Lexicase Selection Beyond Genetic Program-  
719 ming [Series Title: Genetic and Evolutionary Computation]. In W. Banzhaf, L. Spec-  
720 tor, & L. Sheneman (Eds.), *Genetic Programming Theory and Practice XVI* (pp. 123–  
721 136). Springer International Publishing. [https://doi.org/10.1007/978-3-030-](https://doi.org/10.1007/978-3-030-04735-1_7)  
722 [04735-1\\_7](https://doi.org/10.1007/978-3-030-04735-1_7)
- 723 Moore, J. M., & Stanton, A. (2017). Lexicase selection outperforms previous strategies for  
724 incremental evolution of virtual creature controllers. *Proceedings of the 14th Euro-*  
725 *pean Conference on Artificial Life ECAL 2017*, 290–297. [https://doi.org/10.7551/](https://doi.org/10.7551/ecal_a_050)  
726 [ecal\\_a\\_050](https://doi.org/10.7551/ecal_a_050)
- 727 Mouret, J.-B., & Clune, J. (2015). Illuminating search spaces by mapping elites [arXiv:  
728 1504.04909]. *arXiv:1504.04909 [cs, q-bio]*. Retrieved November 23, 2021, from  
729 <http://arxiv.org/abs/1504.04909>
- 730 Mühlenbein, H., & Schlierkamp-Voosen, D. (1993). Predictive Models for the Breeder Ge-  
731 netic Algorithm I. Continuous Parameter Optimization. *Evolutionary Computation*,  
732 1(1), 25–49. <https://doi.org/10.1162/evco.1993.1.1.25>
- 733 Neuwirth, E. (2014). *Rcolorbrewer: Colorbrewer palettes* [R package version 1.1-2]. [https://](https://CRAN.R-project.org/package=RColorBrewer)  
734 [CRAN.R-project.org/package=RColorBrewer](https://CRAN.R-project.org/package=RColorBrewer)
- 735 Ofria, C., Bryson, D. M., & Wilke, C. O. (2009). Avida: A Software Platform for Research  
736 in Computational Evolutionary Biology. In M. Komosinski & A. Adamatzky (Eds.),  
737 *Artificial Life Models in Software* (pp. 3–35). Springer London. [https://doi.org/10.](https://doi.org/10.1007/978-1-84882-285-6_1)  
738 [1007/978-1-84882-285-6\\_1](https://doi.org/10.1007/978-1-84882-285-6_1)
- 739 Ofria, C., Moreno, M. A., Dolson, E., Lalejini, A., Rodriguez-Papa, S., Fenton, J., Perry, K.,  
740 Jorgensen, S., Hoffman, R., Miller, R., Edwards, O. B., Stredwick, J., G, N. C., Clemons,  
741 R., Vostinar, A., Moreno, R., Schossau, J., Zaman, L., & Rainbow, D. (2020). Empirical:  
742 A scientific software library for research, education, and public engagement [doi:  
743 [10.5281/zenodo.4141943](https://doi.org/10.5281/zenodo.4141943)]. <https://doi.org/10.5281/zenodo.4141943>

- 744 O'Hagan, S., Knowles, J., & Kell, D. B. (2012). Exploiting Genomic Knowledge in Optimising  
745 Molecular Breeding Programmes: Algorithms from Evolutionary Computing (J. Bon-  
746 gard, Ed.). *PLoS ONE*, 7(11), e48862. <https://doi.org/10.1371/journal.pone.0048862>
- 747 R Core Team. (2021). *R: A language and environment for statistical computing*. R Founda-  
748 tion for Statistical Computing. Vienna, Austria. <https://www.R-project.org/>
- 749 Ramasubramanian, V., & Beavis, W. D. (2021). Strategies to Assure Optimal Trade-Offs  
750 Among Competing Objectives for the Genetic Improvement of Soybean. *Frontiers*  
751 *in Genetics*, 12, 675500. <https://doi.org/10.3389/fgene.2021.675500>
- 752 Ratcliff, W. C., Denison, R. F., Borrello, M., & Travisano, M. (2012). Experimental evolution  
753 of multicellularity. *Proceedings of the National Academy of Sciences*, 109(5), 1595–  
754 1600. <https://doi.org/10.1073/pnas.1115323109>
- 755 Rice, W. R. (1989). Analyzing Tables of Statistical Tests. *Evolution*, 43(1), 223. <https://doi.org/10.2307/2409177>
- 757 Sánchez, Á., Vila, J. C., Chang, C.-Y., Diaz-Colunga, J., Estrela, S., & Rebolleda-Gomez, M.  
758 (2021). Directed Evolution of Microbial Communities. *Annual Review of Biophysics*,  
759 50(1), annurev-biophys-101220-072829. [https://doi.org/10.1146/annurev-biophys-](https://doi.org/10.1146/annurev-biophys-101220-072829)  
760 [101220-072829](https://doi.org/10.1146/annurev-biophys-101220-072829)
- 761 Shin, S.-Y., Lee, I.-H., Kim, D., & Zhang, B.-T. (2005). Multiobjective Evolutionary Optimiza-  
762 tion of DNA Sequences for Reliable DNA Computing. *IEEE Transactions on Evolu-*  
763 *tionary Computation*, 9(2), 143–158. <https://doi.org/10.1109/TEVC.2005.844166>
- 764 Simon, B., Fletcher, J. A., & Doebeli, M. (2013). Towards a general theory of group selection.  
765 *Evolution*, 67(6), 1561–1572. <https://doi.org/10.1111/j.1558-5646.2012.01835.x>
- 766 Spector, L. (2012). Assessment of problem modality by differential performance of lexi-  
767 case selection in genetic programming: A preliminary report. *Proceedings of the*  
768 *fourteenth international conference on Genetic and evolutionary computation con-*  
769 *ference companion - GECCO Companion '12*, 401. [https://doi.org/10.1145/2330784.](https://doi.org/10.1145/2330784.2330846)  
770 [2330846](https://doi.org/10.1145/2330784.2330846)

- 771 Spector, L., Cava, W. L., Shanabrook, S., Helmuth, T., & Pantridge, E. (2018). Relaxations of  
772 Lexicase Parent Selection. In W. Banzhaf, R. S. Olson, W. Tozier, & R. Riolo (Eds.),  
773 *Genetic Programming Theory and Practice XV* (pp. 105–120). Springer International  
774 Publishing. [https://doi.org/10.1007/978-3-319-90512-9\\_7](https://doi.org/10.1007/978-3-319-90512-9_7)
- 775 Swenson, W., Wilson, D. S., & Elias, R. (2000). Artificial ecosystem selection. *Proceedings*  
776 *of the National Academy of Sciences*, 97(16), 9110–9114. [https://doi.org/10.1073/](https://doi.org/10.1073/pnas.150237597)  
777 [pnas.150237597](https://doi.org/10.1073/pnas.150237597)
- 778 Tanese, R. (1989). *Distributed genetic algorithms for function optimization* (PhD Thesis)  
779 [Publication Title: ProQuest Dissertations and Theses]. [https://proxy.lib.umich.edu/](https://proxy.lib.umich.edu/login?url=https://www.proquest.com/dissertations-theses/distributed-genetic-algorithms-function/docview/303814520/se-2?accountid=14667)  
780 [login?url=https://www.proquest.com/dissertations-theses/distributed-genetic-](https://proxy.lib.umich.edu/login?url=https://www.proquest.com/dissertations-theses/distributed-genetic-algorithms-function/docview/303814520/se-2?accountid=14667)  
781 [algorithms-function/docview/303814520/se-2?accountid=14667](https://proxy.lib.umich.edu/login?url=https://www.proquest.com/dissertations-theses/distributed-genetic-algorithms-function/docview/303814520/se-2?accountid=14667)  
782 Copyright - Database copyright ProQuest LLC; ProQuest does not claim copyright  
783 in the individual underlying works; Last updated - 2021-10-04
- 784 Toprak, E., Veres, A., Michel, J.-B., Chait, R., Hartl, D. L., & Kishony, R. (2012). Evolutionary  
785 paths to antibiotic resistance under dynamically sustained drug selection. *Nature*  
786 *Genetics*, 44(1), 101–105. <https://doi.org/10.1038/ng.1034>
- 787 Waibel, M., Keller, L., & Floreano, D. (2009). Genetic Team Composition and Level of Se-  
788 lection in the Evolution of Cooperation. *IEEE Transactions on Evolutionary Compu-*  
789 *tation*, 13(3), 648–660. <https://doi.org/10.1109/TEVC.2008.2011741>
- 790 Wang, Y., Xue, P., Cao, M., Yu, T., Lane, S. T., & Zhao, H. (2021). Directed Evolution: Method-  
791 ologies and Applications. *Chemical Reviews*, [acs.chemrev.1c00260](https://doi.org/10.1021/acs.chemrev.1c00260). [https://doi.org/](https://doi.org/10.1021/acs.chemrev.1c00260)  
792 [10.1021/acs.chemrev.1c00260](https://doi.org/10.1021/acs.chemrev.1c00260)
- 793 Wickham, H. (2016). *Ggplot2: Elegant graphics for data analysis*. Springer-Verlag New York.  
794 <https://ggplot2.tidyverse.org>
- 795 Wickham, H., Averick, M., Bryan, J., Chang, W., McGowan, L. D., François, R., Grolemund, G.,  
796 Hayes, A., Henry, L., Hester, J., Kuhn, M., Pedersen, T. L., Miller, E., Bache, S. M., Müller,  
797 K., Ooms, J., Robinson, D., Seidel, D. P., Spinu, V., ... Yutani, H. (2019). Welcome to

- 798 the tidyverse. *Journal of Open Source Software*, 4(43), 1686. <https://doi.org/10.21105/joss.01686>
- 799
- 800 Wilcoxon, F. (1992). Individual Comparisons by Ranking Methods [Series Title: Springer  
801 Series in Statistics]. In S. Kotz & N. L. Johnson (Eds.), *Breakthroughs in Statistics*  
802 (pp. 196–202). Springer New York. [https://doi.org/10.1007/978-1-4612-4380-9\\_16](https://doi.org/10.1007/978-1-4612-4380-9_16)
- 803 Wilke, C. O. (2020). *Cowplot: Streamlined plot theme and plot annotations for 'ggplot2'* [R  
804 package version 1.1.0]. <https://CRAN.R-project.org/package=cowplot>
- 805 Xie, L., & Shou, W. (2021). Steering ecological-evolutionary dynamics to improve artificial  
806 selection of microbial communities. *Nature Communications*, 12(1), 6799. <https://doi.org/10.1038/s41467-021-26647-4>
- 807
- 808 Xie, L., Yuan, A. E., & Shou, W. (2019). Simulations reveal challenges to artificial community  
809 selection and possible strategies for success (M. L. Siegal, Ed.). *PLOS Biology*, 17(6),  
810 e3000295. <https://doi.org/10.1371/journal.pbio.3000295>
- 811 Yabe, S., Yamasaki, M., Ebana, K., Hayashi, T., & Iwata, H. (2016). Island-Model Genomic  
812 Selection for Long-Term Genetic Improvement of Autogamous Crops (S.-H. Shiu,  
813 Ed.). *PLOS ONE*, 11(4), e0153945. <https://doi.org/10.1371/journal.pone.0153945>
- 814 Yokobayashi, Y., Weiss, R., & Arnold, F. H. (2002). Directed evolution of a genetic circuit.  
815 *Proceedings of the National Academy of Sciences*, 99(26), 16587–16591. <https://doi.org/10.1073/pnas.252535999>
- 816
- 817 Zaman, L., Meyer, J. R., Devangam, S., Bryson, D. M., Lenski, R. E., & Ofria, C. (2014). Coevo-  
818 lution Drives the Emergence of Complex Traits and Promotes Evolvability (L. Keller,  
819 Ed.). *PLoS Biology*, 12(12), e1002023. <https://doi.org/10.1371/journal.pbio.1002023>
- 820 Zitzler, E. (1999). *Evolutionary algorithms for multiobjective optimization: Methods and*  
821 *applications* (Doctoral dissertation) [Artwork Size: 122 S. Medium: application/pdf  
822 Pages: 122 S.]. ETH Zurich. <https://doi.org/10.3929/ETHZ-A-003856832>
- 823 Other Berichte aus der Informatik, 0300 Other ISBN:3-8265-6831-1
